# Supplementary material for: Universal assembly of ordered Ag nanowire micromesh conductors on arbitrary substrates by manipulating the contact angle
Source: Royal Society of Chemistry journal article supplement (doi:10.1039/d3ta00086a), 2023-01-01
Supplement: d3ta00086a1.pdf [file d3ta00086a1.pdf]

## Supporting Information

### Universal assembly of ordered Ag nanowires micromesh conductor on arbitrary substrates by manipulating the contact angle

Bowen Sun,<sup>abcd</sup> Jing Xu,<sup>a</sup> Wang Hong,<sup>a</sup> Zhiwei Fu,<sup>a</sup> Shouguo Zheng,<sup>de</sup> Zede Zhu,<sup>de</sup> Rong Cai<sup>f</sup> and Kai Qian<sup>\*abcd</sup>

<sup>a</sup>School of Microelectronics, Shandong University, Jinan, 250100, China

<sup>b</sup>Shenzhen Research Institute of Shandong University, Shenzhen, 518057, China

<sup>c</sup>Suzhou Research Institute of Shandong University, Suzhou, 215123, China

<sup>d</sup>Lu'an Branch, Anhui Institute of Innovation for Industrial Technology, Lu'an, 237100, China

<sup>e</sup>Hefei Institutes of Physical Science, Chinese Academy of Sciences, Hefei 230031, China

<sup>f</sup>School of Pharmaceutical Sciences, Shandong University, Jinan, 250012, China

\*E-mail: kaiqian@sdu.edu.cn

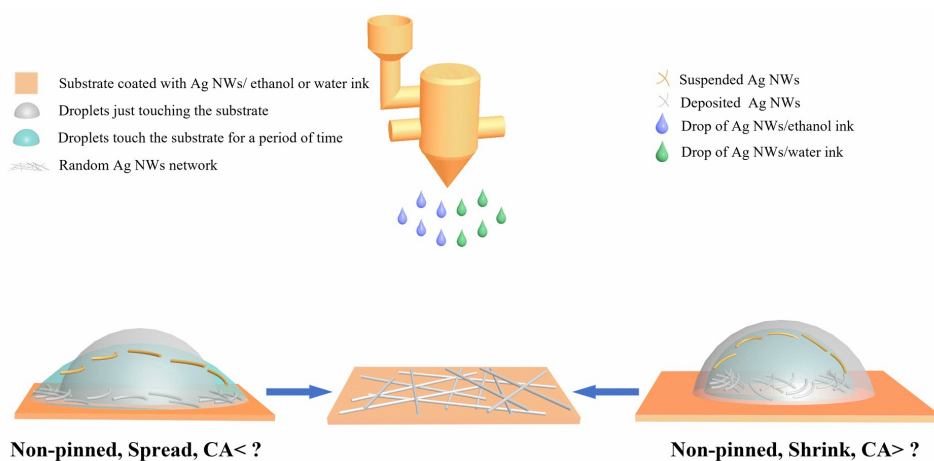

**Fig. S1** Contact angle of Ag NWs ink effect on Ag NWs networks morphology.

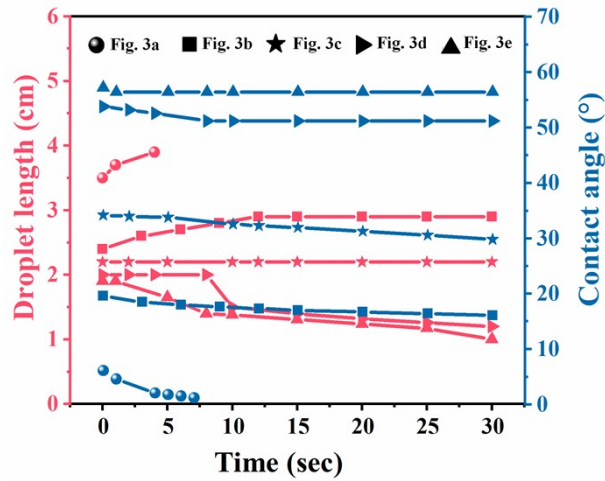

**Fig. S2** The droplet length and contact angle variation of Ag NWs/ethanol ink as a function of solvent evaporation time.

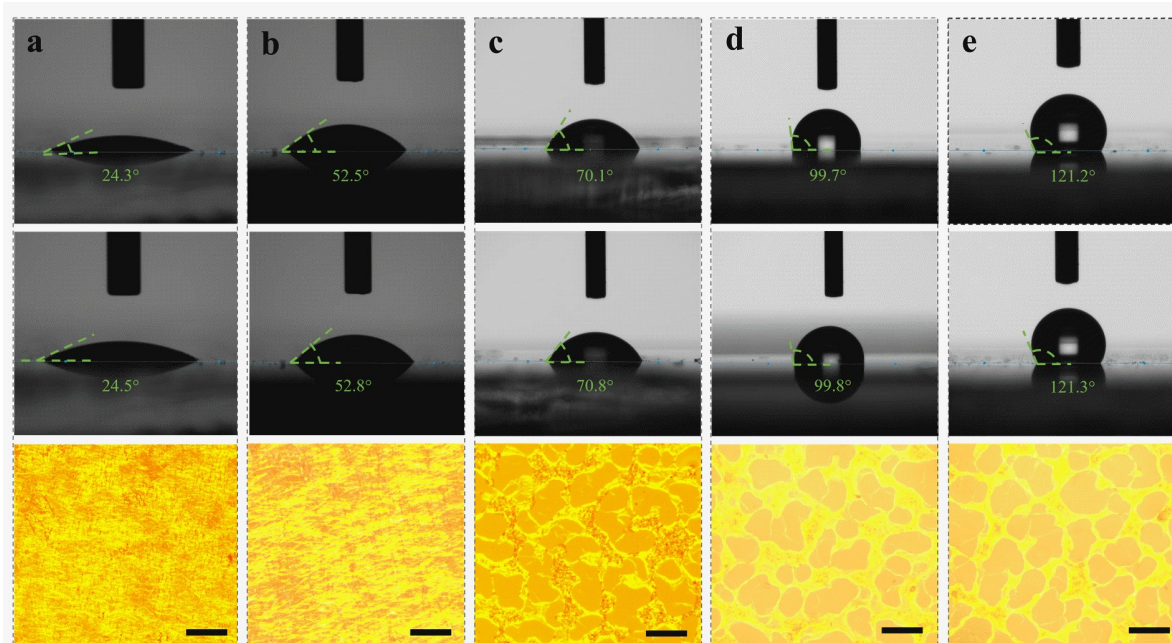

**Fig. S3** (a) Water contact angle on pure glass, corresponding to Ag NWs/water ink contact angle and the morphology of Ag NWs networks. (b-e) Different water contact angles on modified glasses, corresponding to Ag NWs/water ink contact angles and the morphology of Ag NWs networks, respectively. These indicated that the water contact angle was almost same with the Ag NWs/water ink contact angle on substrate. Scale bar, 30  $\mu\text{m}$ .

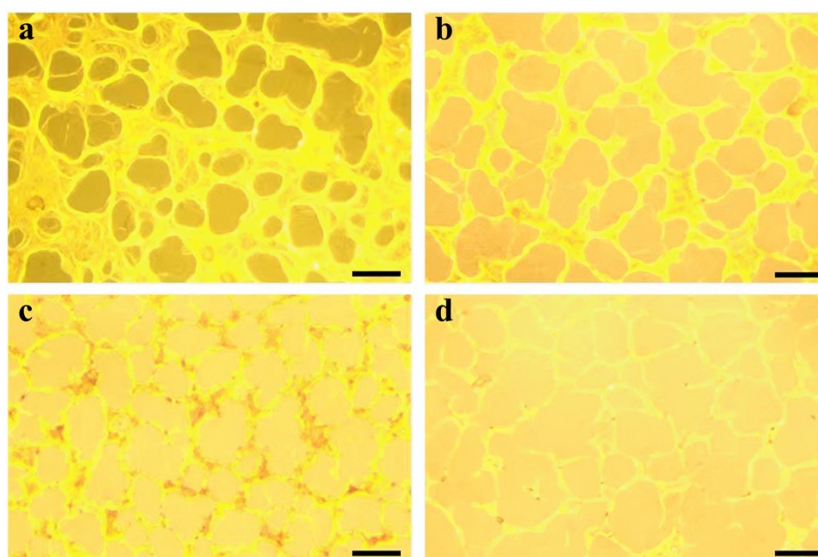

**Fig. S4** (a) diameter:  $\sim 20$  nm, length: 20-60  $\mu\text{m}$ . (b) diameter:  $\sim 30$  nm, length: 20-60  $\mu\text{m}$ . (c) diameter:  $\sim 50$  nm, length: 20-60  $\mu\text{m}$ . (d) diameter:  $\sim 100$  nm, length: 100-200  $\mu\text{m}$ . Scale bar, 30  $\mu\text{m}$ .

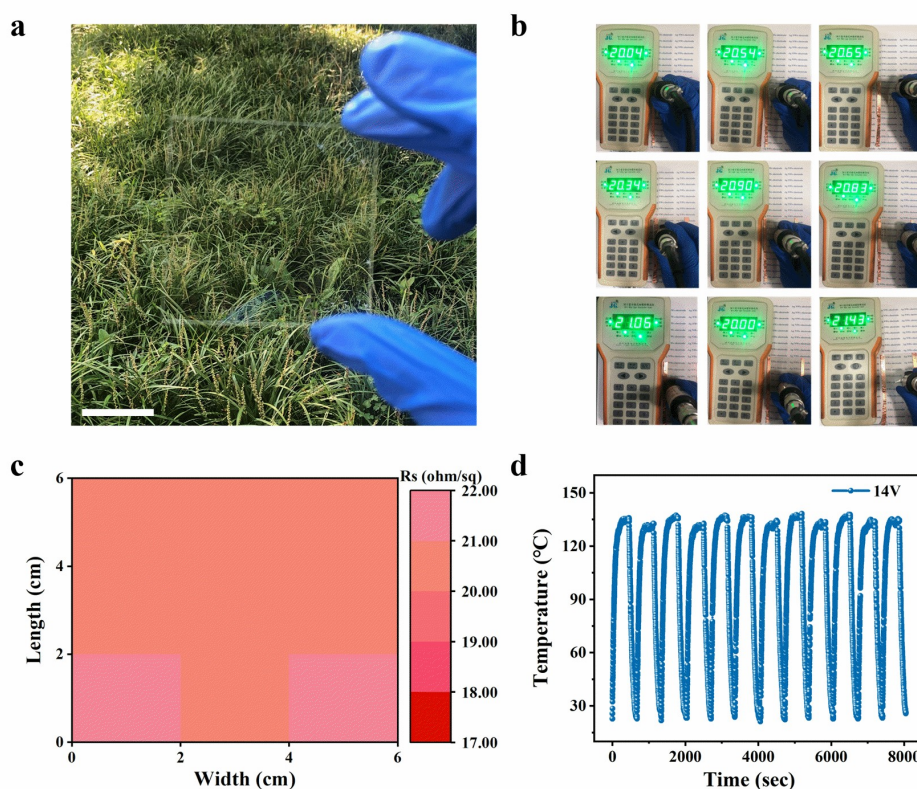

**Fig. S5** (a) The photograph of transparent Ag NMs/glass heater. (b) The sheet resistance distribution of Ag NMs/glass heater (6 cm  $\times$  6 cm), corresponding to the area mapping (c). (d) Heating stability and repeatability of the Ag NMs/glass heater at 14V.

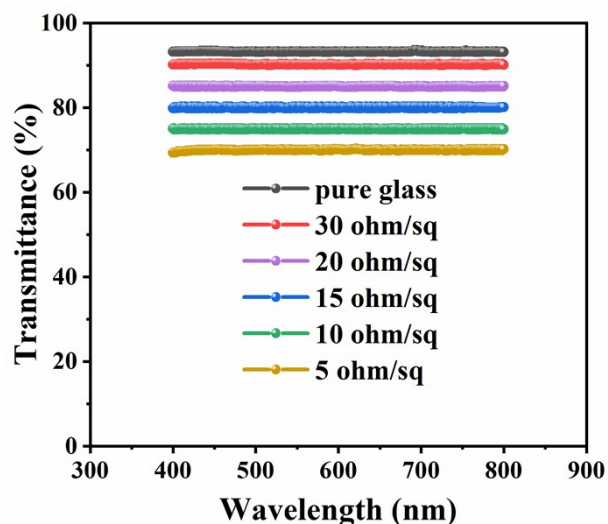

**Fig. S6** Transmittance spectra of Ag NMs/glass electrode with different sheet resistances.

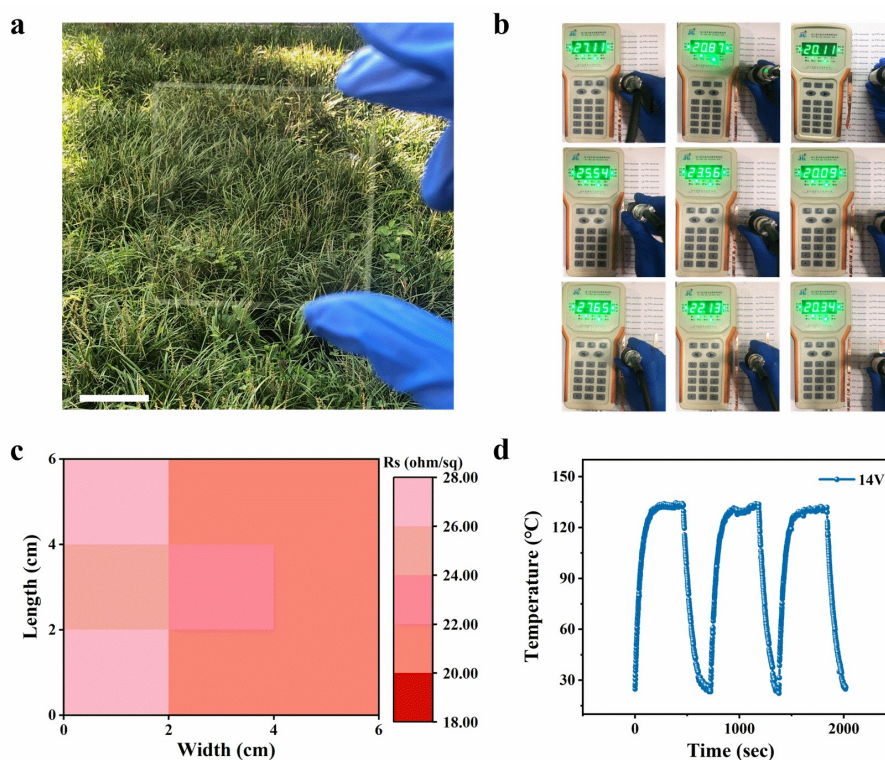

**Fig. S7** (a) The photograph of transparent random Ag NWs/glass heater. (b) The sheet resistance distribution of random Ag NWs/glass heater (6 cm × 6 cm), corresponding to the area mapping (c). (d) Heating stability and repeatability of the random Ag NWs/glass heater at 14V.

### Supplementary Movies

**Movie S1.** Dynamic evolution process of Ag NWs/ethanol ink on pure glass surface. The initial Ag NWs/ethanol CA was  $\sim 6.1^\circ$ .

**Movie S2.** Dynamic evolution process of Ag NWs/ethanol ink on modified glass surface. The initial Ag NWs/ethanol CA was  $\sim 19.6^\circ$ .

**Movie S3.** Dynamic evolution process of Ag NWs/ethanol ink on modified glass surface. The initial Ag NWs/ethanol CA was  $\sim 34.2^\circ$ .

**Movie S4.** Dynamic evolution process of Ag NWs/ethanol ink on modified glass surface. The initial Ag NWs/ethanol CA was  $\sim 53.8^\circ$ .

**Movie S5.** Dynamic evolution process of r Ag NWs/ethanol ink on modified glass surface. The initial Ag NWs/ethanol CA was  $\sim 57.2^\circ$ .

**Movie S6.** Dynamic evolution process of Ag NWs/water ink on modified glass surface. The initial Ag NWs/water CA was  $\sim 52.8^\circ$ .

**Movie S7.** Dynamic evolution process of Ag NWs/water ink on modified glass surface. The initial Ag NWs/water CA was  $\sim 56.7^\circ$ .

**Movie S8.** Dynamic evolution process of Ag NWs/water ink on modified glass surface. The initial Ag NWs/water CA was  $\sim 60.5^\circ$ .

**Movie S9.** Dynamic evolution process of Ag NWs/water ink on modified glass surface. The initial Ag NWs/water CA was  $\sim 139.8^\circ$ .

**Movie S10.** Dynamic evolution process of Ag NWs/water ink on modified glass surface. The initial Ag NWs/water CA was  $\sim 147.2^\circ$ .

**Movie S11.** Dynamic evolution process of Ag NWs/water ink on modified glass surface. The initial Ag NWs/water CA was  $\sim 157.5^\circ$ .

**Movie S12.** The thermo-chromic processes of chameleon pattern on Ag NMs/PET heater surface upon different temperature.

**Movie S13.** The color change process of chameleon pattern on Ag NMs/PET heater surface upon different temperature under mechanical bending.

**Movie S14.** The thermo-chromic processes of QR code on Ag NMs/glass heater surface upon different temperature.
